# Supplementary material for: Liquid-liquid triboelectric nanogenerator based on the immiscible interface of an aqueous two-phase system
Source: PubMed Central journal article supplement (PMC9463141; doi:10.1038/s41467-022-33086-2), 2022-09-09
Supplement: 41467_2022_33086_MOESM2_ESM.pdf [file 41467_2022_33086_MOESM2_ESM.pdf]

## **Description of Additional Supplementary Files**

File Name: Supplementary Movie 1

Description: Working demonstration of the L-L TENG.

File Name: Supplementary Movie 2

Description: Demonstration of the establishment of the aqueous two-phase system.

File Name: Supplementary Movie 3

Description: Demonstration of lightening the LED by the L-L TENG in series.

File Name: Supplementary Movie 4

Description: Demonstration of the L-L TENG as power supply for electronic devices after charging capacitor.

File Name: Supplementary Movie 5

Description: Demonstration of the biocompatibility of the L-L TENG as a suitable protein microreactor.
